# Supplementary material
Source: PubMed Central journal article supplement (PMC3055786)
Supplement: NIHMS274813-supplement-Supplement.pdf [file NIHMS274813-supplement-Supplement.pdf]

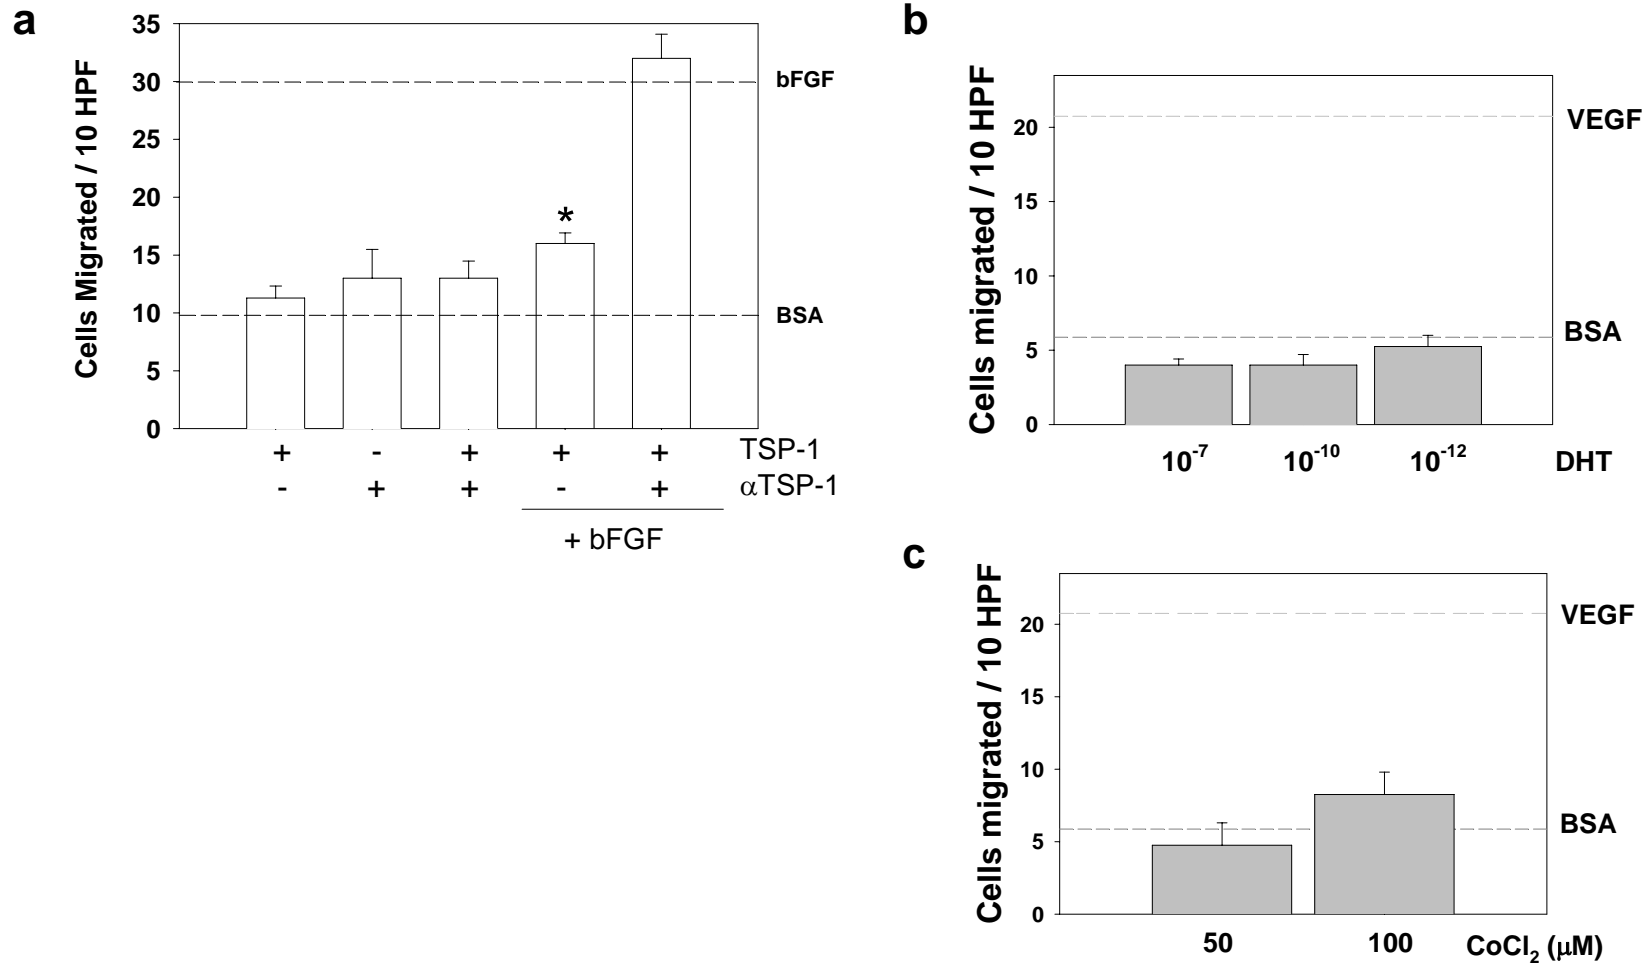

**Supplemental Figure 1** Controls for migration assays. Angiogenic activity was assessed using a microvascular endothelial cell migration assay, and data are presented as the mean  $\pm$  SE of the number of cells migrated. Dashed lines represent a baseline control for migration activity (BSA) and inducer-stimulated activity (bFGF, 15 ng/ml). **(a)** Neutralizing activity of the TSP-1 antibody (40  $\mu$ g/ml) was tested against purified TSP-1 protein (5 nM) in the presence of angiogenic inducer bFGF. DHT **(b)** and CoCl<sub>2</sub> **(c)** were tested alone as controls for migration activity. Neither reagent stimulated migration. \*Significantly different compared to bFGF alone,  $P < 0.003$ .
